# Supplementary material for: Expression of plant-produced anti-PD-L1 antibody with anoikis sensitizing activity in human lung cancer cells via., suppression on epithelial-mesenchymal transition
Source: PubMed Central journal article supplement (PMC9651560; doi:10.1371/journal.pone.0274737), 2022-11-11

## Supplementary Raw Data

**Figure S1.** SDS PAGE & Western Blot of Plant-produced Atezolizumab

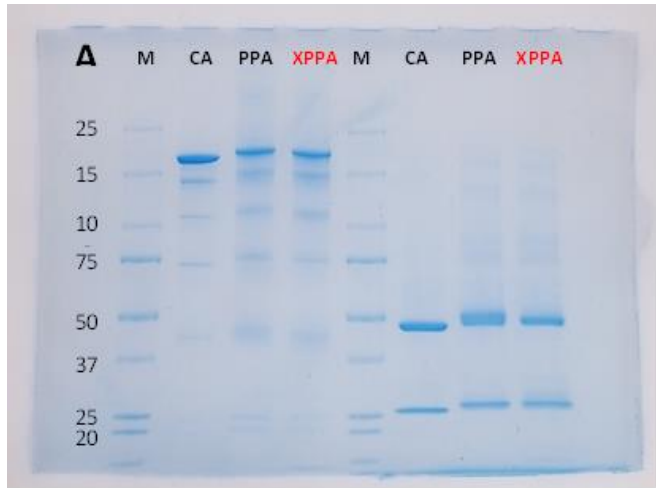

**A:** SDS gel picture stained with Coomassie

**B:** Western blot analysis with sheep anti-human gamma-HRP under Non-reducing and reducing conditions

**C:** Western blot analysis with sheep anti-human kappa-HRP under Non-reducing and reducing conditions

**M:** Protein ladder

**CA:** Commercial Atezolizumab

**PPA:** Plant-produced Atezolizumab

**XPPA:** Plant-produced Atezolizumab loaded at different concentration but not included in the Manuscript file

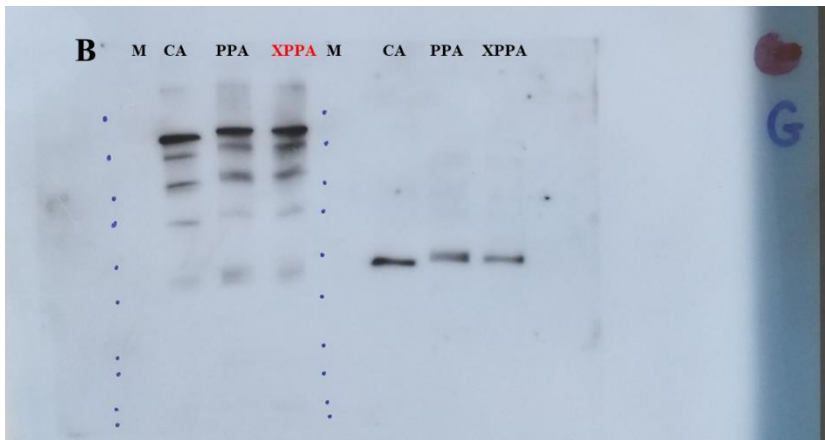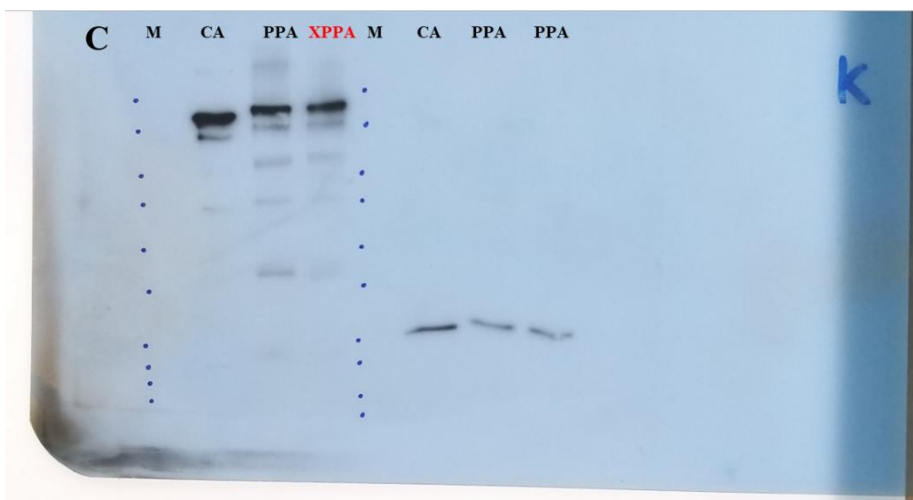

Supplement: pone.0274737.s002.pdf [file pone.0274737.s002.pdf]
